# Supplementary material for: The effects of plastic slatted floor and a deep- litter system on the growth performance of hybrid Pekin ducks
Source: Copernicus journal article supplement (doi:10.5194/aab-64-1-2021), 2021-01-04
Supplement: Supplementary file [file aab-64-1-2021-supplement.pdf]

Supplement of Arch. Anim. Breed., 64, 1–6, 2021  
<https://doi.org/10.5194/aab-64-1-2021-supplement>  
© Author(s) 2021. This work is distributed under  
the Creative Commons Attribution 4.0 License.

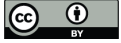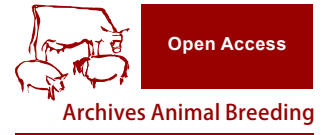

*Supplement of*

## **The effects of plastic slatted floor and a deep-litter system on the growth performance of hybrid Pekin ducks**

**Sabri Arda Eratalar**

*Correspondence to:* Sabri Arda Eratalar (ardaeratalar@ibu.edu.tr)

The copyright of individual parts of the supplement might differ from the CC BY 4.0 License.

## Tables

**Table 1.** The nutritive and chemical values of the feed used in the experiment.

|                                           | <b>Starter</b><br>0-14 days | <b>Grower</b><br>15 days-<br>Slaughter |
|-------------------------------------------|-----------------------------|----------------------------------------|
| Metabolic energy<br>kcal kg <sup>-1</sup> | 2,900.00                    | 3,100.00                               |
| Crude protein, g kg <sup>-1</sup>         | 200.00                      | 172.00                                 |
| Crude cellulose, g kg <sup>-1</sup>       | 40.00                       | 40.50                                  |
| Crude fat, g kg <sup>-1</sup>             | 40.13                       | 58.10                                  |
| Crude ash, g kg <sup>-1</sup>             | 60.33                       | 63.30                                  |
| Lysine, g kg <sup>-1</sup>                | 10.00                       | 8.00                                   |
| Methionine, g kg <sup>-1</sup>            | 5.50                        | 4.00                                   |
| Calcium, g kg <sup>-1</sup>               | 100.00                      | 90.00                                  |
| Phosphorus, g kg <sup>-1</sup>            | 7.20                        | 6.50                                   |
| Sodium, g kg <sup>-1</sup>                | 1.60                        | 1.70                                   |
| Vitamin A, g kg <sup>-1</sup>             | 1.271                       | 1.271                                  |
| Vitamin D3, g kg <sup>-1</sup>            | 0.53                        | 0.53                                   |
| Manganese, mg kg <sup>-1</sup>            | 120.00                      | 120.00                                 |
| Zinc, mg kg <sup>-1</sup>                 | 110.00                      | 110.00                                 |
| Copper, mg kg <sup>-1</sup>               | 16.00                       | 16.00                                  |
| Iodine, mg kg <sup>-1</sup>               | 1.50                        | 1.50                                   |
| Selenium, mg kg <sup>-1</sup>             | 0.30                        | 0.30                                   |
| NaCl, mg kg <sup>-1</sup>                 | 0,44                        | 0,42                                   |

**Formula 1.** The FCR calculation formula (Anonymous, 2012).

$$\text{Feed conversion ratio (FCR)} = \frac{\text{Feed consumed in kg (FC)}}{\text{Live weight in kg (LW)}}$$

**Table 2.** The effects of PSF and WS on the field performance of Pekin ducks (Mean  $\pm$  SEM).

|                                            | <b>Litter Material</b> |                         |                 |
|--------------------------------------------|------------------------|-------------------------|-----------------|
|                                            | <b>Wood Shavings</b>   | <b>P. Slatted Floor</b> | <b>p-values</b> |
| <b>Live Weight, g/duckling/compartment</b> |                        |                         |                 |
| Start*                                     | 54.50                  | 54.50                   |                 |
| 2 <sup>nd</sup> Week                       | 769 $\pm$ 13           | 734 $\pm$ 19            | 0.120           |
| 4 <sup>th</sup> Week                       | 1,584 $\pm$ 81         | 1,564 $\pm$ 85          | 0.866           |
| 6 <sup>th</sup> Week                       | 3,314 $\pm$ 46         | 3,450 $\pm$ 69          | 0.104           |
| <b>Total Live Weight Gain, g/day</b>       |                        |                         |                 |
| 2. Week                                    | 51 $\pm$ 1             | 49 $\pm$ 1              | 0.120           |
| 4. Week                                    | 55 $\pm$ 3             | 54 $\pm$ 3              | 0.866           |
| 6. Week                                    | 78 $\pm$ 1             | 81 $\pm$ 2              | 0.104           |
| <b>Total Live Weight, kg/m<sup>2</sup></b> |                        |                         |                 |
|                                            | 9.94 $\pm$ 0.07        | 10.35 $\pm$ 0.17        | 0.069           |

\* Ducklings were weighed en masse at start.

**Table 3.** The effects of PSF and WS on feed consumption and FCR of Pekin ducks (Mean  $\pm$  SEM).

|                                           | <b>Litter Material</b>         |                                | <b>p-values</b> |
|-------------------------------------------|--------------------------------|--------------------------------|-----------------|
|                                           | <b>Wood Shavings</b>           | <b>P. Slatted Floor</b>        |                 |
| <b>Total Feed Consumption, g/duckling</b> |                                |                                |                 |
| 2. Week*                                  | 1167                           | 1167                           |                 |
| 4. Week                                   | 2,924 $\pm$ 69                 | 2,807 $\pm$ 51                 | 0.220           |
| 6. Week                                   | 6,160 $\pm$ 83                 | 6,039 $\pm$ 92                 | 0.369           |
| <b>Feed Conversion Ratio (FCR)</b>        |                                |                                |                 |
| 2. Week                                   | 1.519 $\pm$ 0.032              | 1.596 $\pm$ 0.058              | 0.291           |
| 4. Week                                   | 1.847 $\pm$ 0.037              | 1.813 $\pm$ 0.093              | 0.739           |
| 6. Week                                   | 1.859 $\pm$ 0.020 <sup>a</sup> | 1.751 $\pm$ 0.022 <sup>b</sup> | 0.011           |

<sup>ab</sup> The different superscript letters on the same line indicate statistical significance ( $p < 0.05$ ).

\* The feed consumption for the first week was collected en masse.

**Table 4.** The effects of PSF and WS on water consumption water/feed consumption ratio (Mean  $\pm$  SEM).

|                                       | <b>Litter Material</b>         |                                | <b>p-values</b> |
|---------------------------------------|--------------------------------|--------------------------------|-----------------|
|                                       | <b>Wood Shavings</b>           | <b>P. Slatted Floor</b>        |                 |
| <b>Water Consumption, ml/duckling</b> |                                |                                |                 |
| 2. Week                               | 156 $\pm$ 3                    | 152 $\pm$ 10                   | 0.477           |
| 4. Week                               | 297 $\pm$ 4                    | 297 $\pm$ 21                   | 0.950           |
| 6. Week                               | 441 $\pm$ 8                    | 469 $\pm$ 12                   | 0.099           |
| <b>Water / Feed Consumption Ratio</b> |                                |                                |                 |
| 2. Week                               | 1.875 $\pm$ 0.034              | 1.821 $\pm$ 0.062              | 0.477           |
| 4. Week                               | 2.849 $\pm$ 0.084              | 2.952 $\pm$ 0.057              | 0.351           |
| 6. Week                               | 3.010 $\pm$ 0.088 <sup>a</sup> | 3.259 $\pm$ 0.042 <sup>b</sup> | 0.041           |

<sup>ab</sup> The different superscript letters on the same line indicate statistical significance ( $p < 0.05$ ).
